# Supplementary material
Source: Springer Nature journal article supplement (https://www.springermedizin.de/resource/supplementary/12936_2011_2024_MOESM4_ESM.pdf/9543350)

## TLR2 Protein Expression

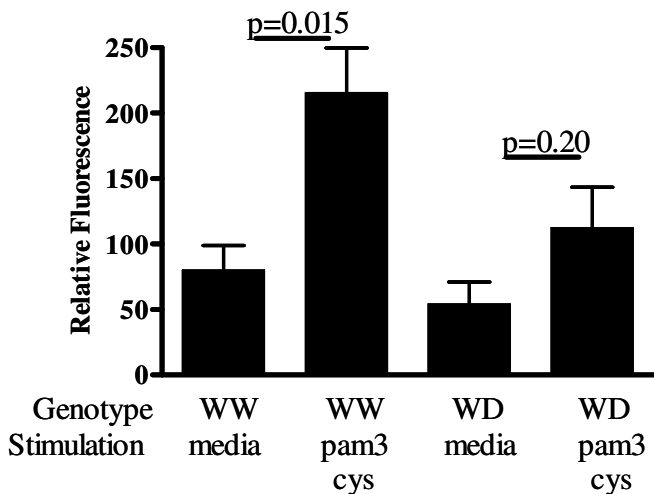

## TLR2 protein expression

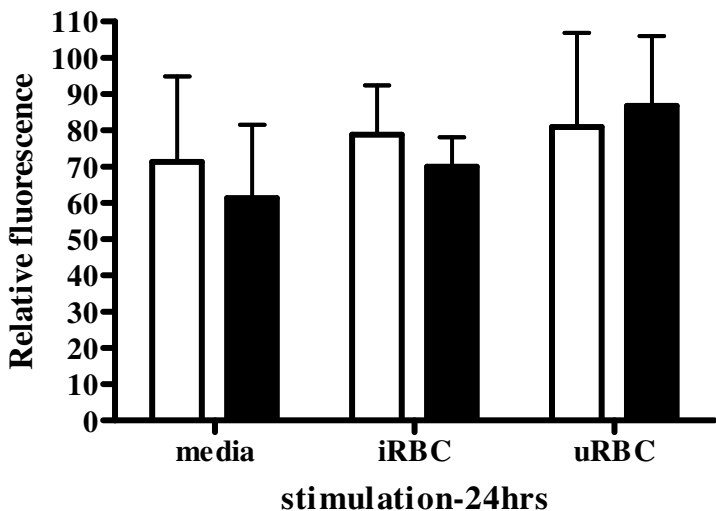

Supplement: MOESM4 [file 9543350]
